# Supplementary figures and images for: Reactivation of Herpes Simplex Virus Type 1 (HSV-1) Detected on Bronchoalveolar Lavage Fluid (BALF) Samples in Critically Ill COVID-19 Patients Undergoing Invasive Mechanical Ventilation: Preliminary Results from Two Italian Centers
Source: MDPI journal article supplement (doi:10.3390/microorganisms10020362), 2022-02-04

### Supplementary figure S1. Flow-chart of the patient inclusion process

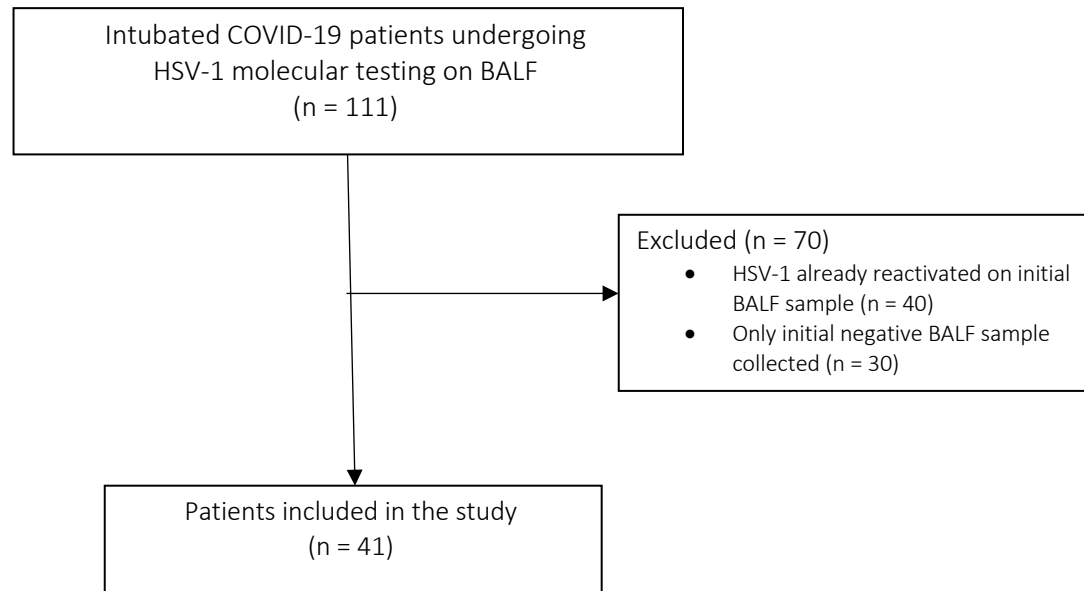

Supplement: s1 [file s1]
